# Supplementary material for: Single high-fat challenge and trained innate immunity: A randomized controlled cross-over trial
Source: PubMed Central journal article supplement (PMC11530819; doi:10.1016/j.isci.2024.111103), 2024-10-05
Supplement: mmc1.pdf [file mmc1.pdf]

**iScience, Volume 27**

## **Supplemental information**

### **Single high-fat challenge and trained innate**

### **immunity: A randomized controlled cross-over trial**

**Julia van Tuijl, Julia I.P. van Heck, Harsh Bahrar, Wieteke Broeders, Johan Wijma, Yvonne M. ten Have, Martin Giera, Heidi Zweers-van Essen, Laura Rodwell, Leo A.B. Joosten, Mihai G. Netea, Lydia A. Afman, Siroon Bekkering, and Niels P. Riksen**

Supplemental information

Supplementary figures

Figure S1. Flow diagram of the randomization process. Related to Figure 1.

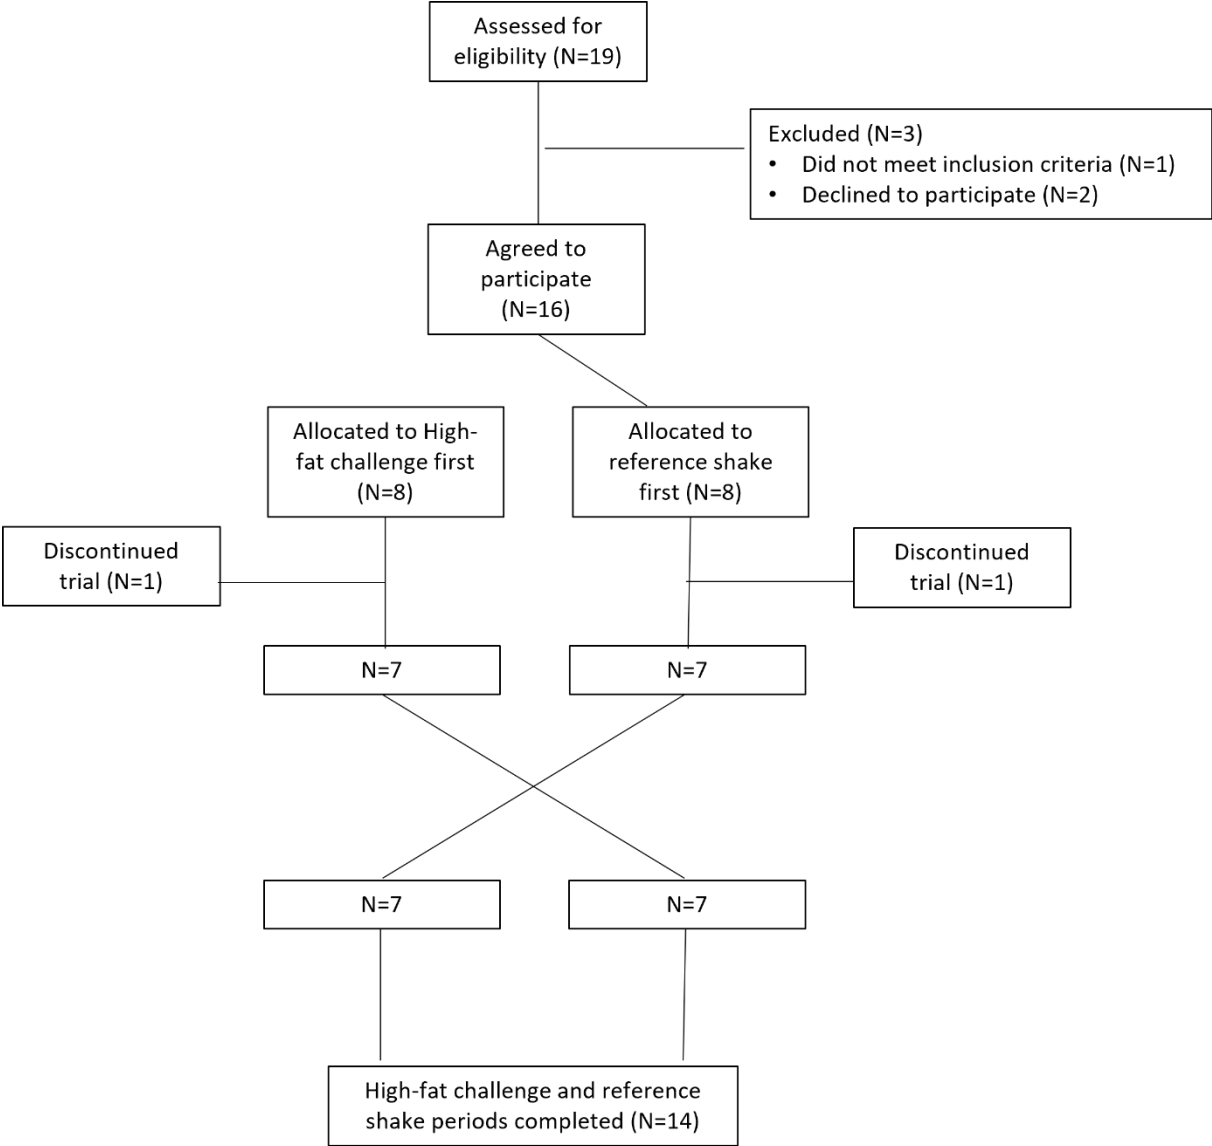

Figure S2

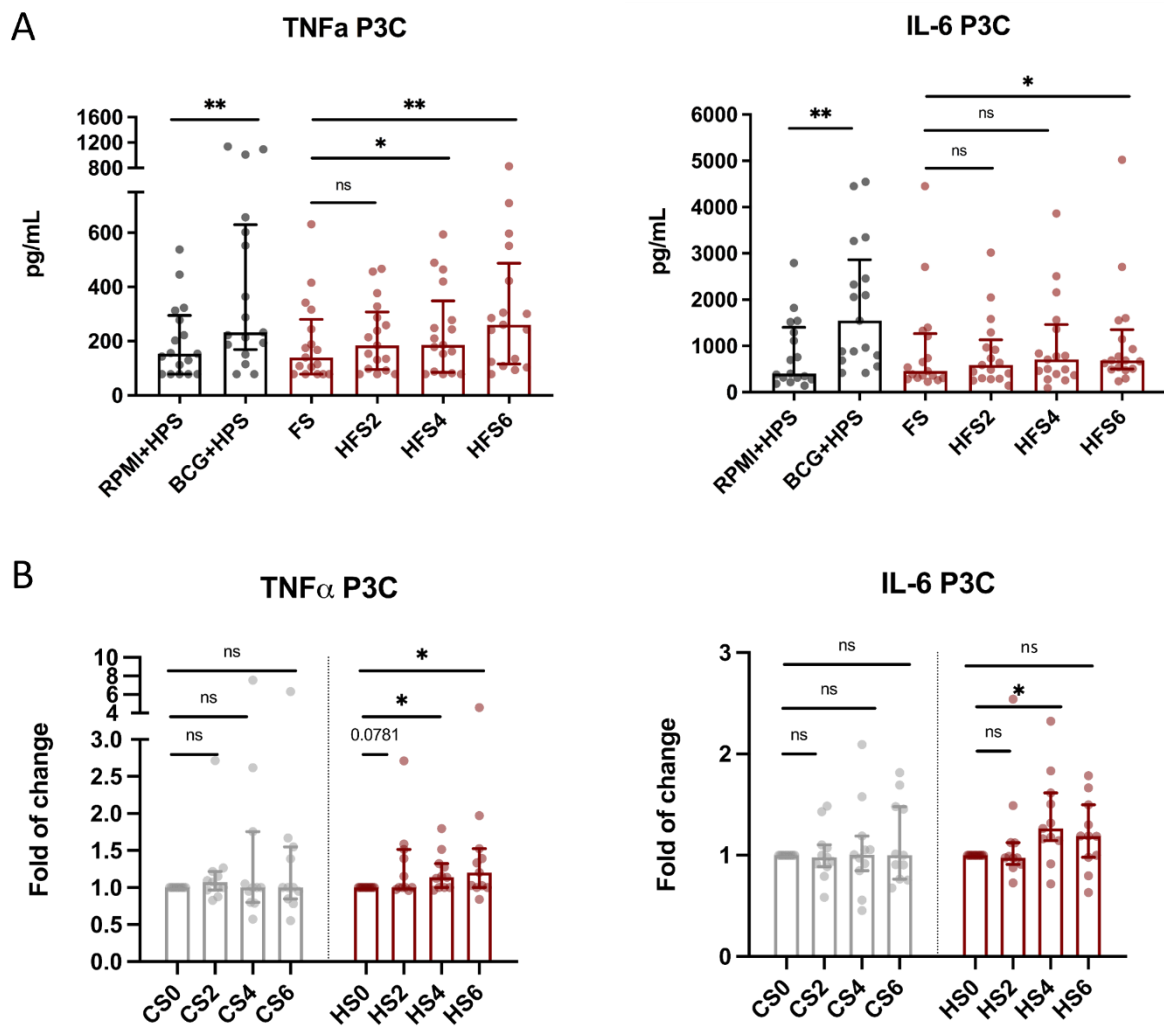

**Figure S2, related to Figure 2.** Exposure to serum obtained after a high-fat shake, but not after a common breakfast shake, induces trained immunity in healthy human monocytes. **A.** Serum obtained after the high-fat shake increased TNF $\alpha$  and IL-6 production of human monocyte-derived macrophages upon secondary stimulation with P3C, with the highest cytokine production after stimulation with serum obtained at t=6h (n=17). **B.** Cytokine production capacity was measured after 24h exposure to reference shake serum (CS) and the high-fat shake serum (HFS). Data are presented as fold of change to the fasting serum obtained before consumption of the control shake (CS0) or the high-fat shake (HFS0) (n=11). Median  $\pm$ IQR. \* indicates  $p < 0.05$ , \*\*  $p < 0.01$ , Wilcoxon-signed rank test.

Figure S3

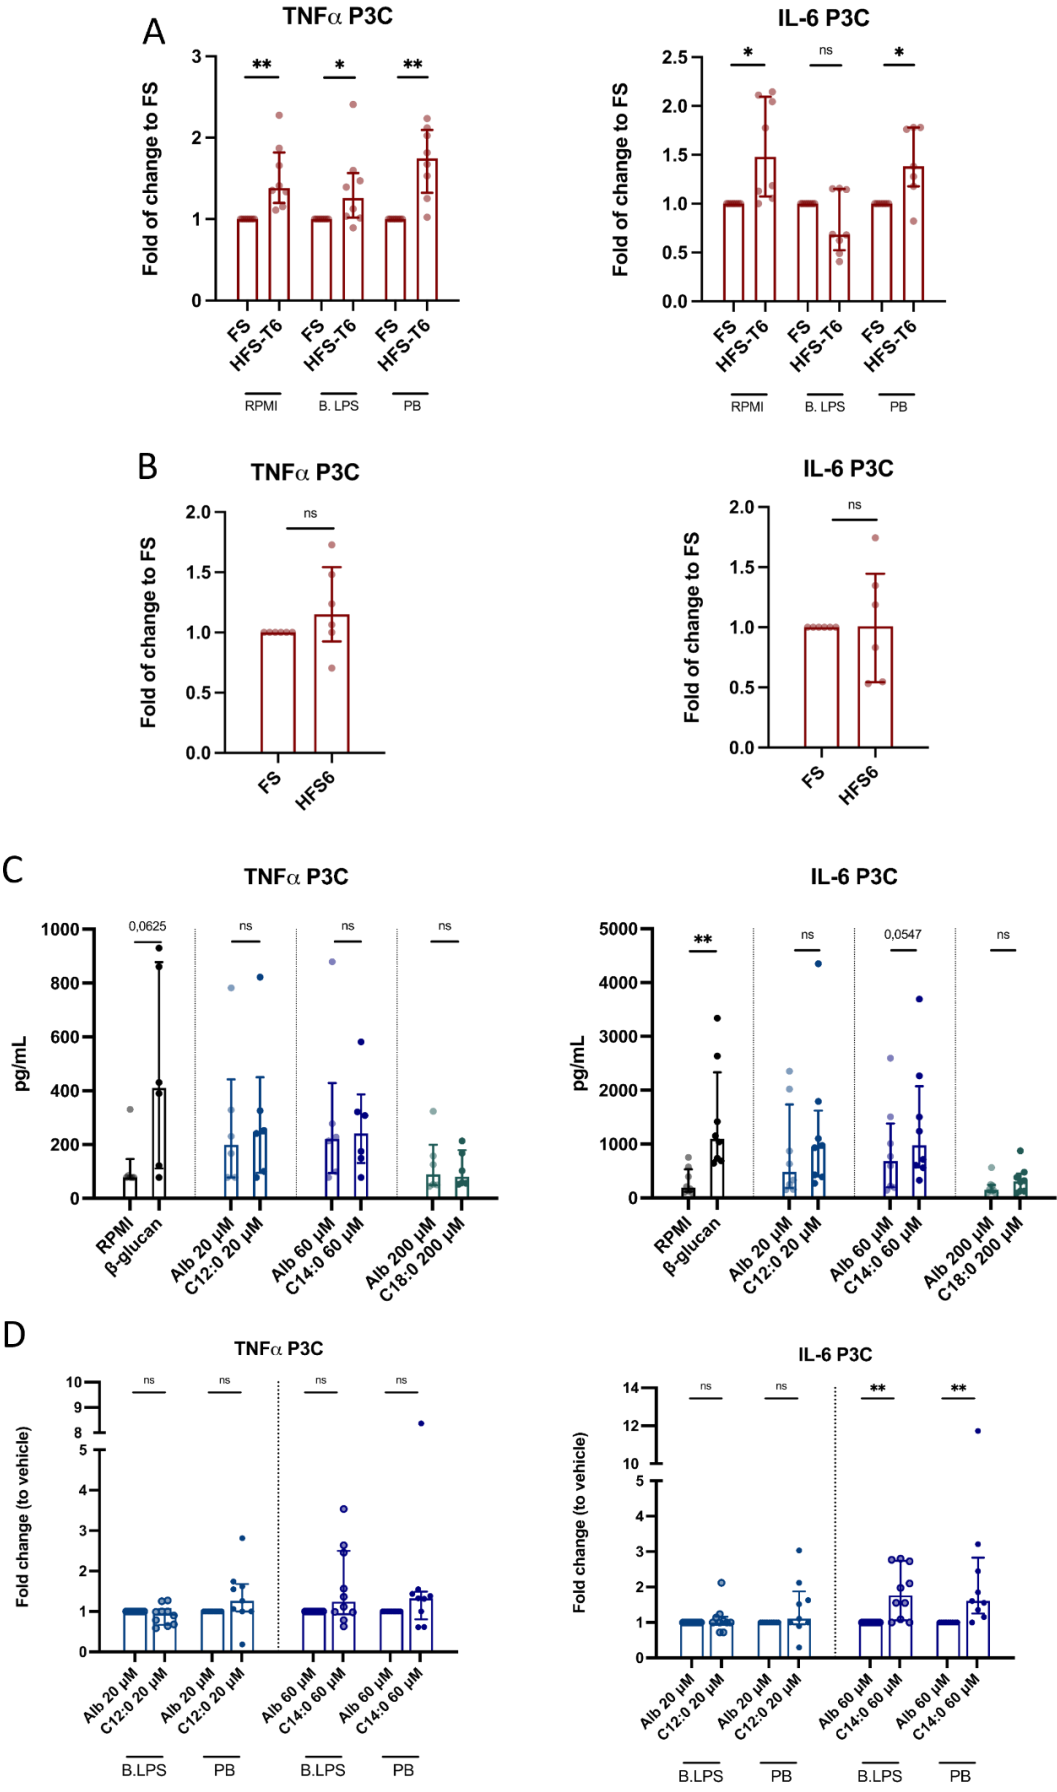

**Figure S3, related to Figure 3.** High-fat shake induced trained immunity is regulated via TLR4, but is not mediated via low-dose LPS, triglyceride-rich lipoproteins or the saturated fatty acids that are particularly increased after the high-fat shake. **A.** Adherent human monocytes were pre-incubated for 1 hour with plain RPMI or Bartonella LPS (B. LPS). After pre-incubation, the cells were exposed for 24 hours to high-fat serum obtained at t=0h (HFS0) or at t=6h (HFS6), with (PB) or without neutralization of LPS. On day 6, cells were restimulated with P3C for 24 hours and cytokine production was measured (n=8). Data are presented as fold of change to HFS0 for each separate inhibitor. **B.** HFS0 and HFS6 were depleted from apoB-containing lipoproteins before use in the training experiments (n=6). **C.** Monocytes were stimulated for 24 hours with albumin-conjugated C12:0, C14:0 and C18:0 or with the albumin vehicle (Alb) alone. After resting and differentiation, cytokine production upon restimulation was measured (TNF $\alpha$  n=6, IL-6 n=8). **D.** The same inhibition experiments as described under A. were performed for C12:0 and C14:0. Data are presented as fold of change to the vehicle control for each separate inhibitor (B. LPS n=10, PB n=9). Median  $\pm$ IQR. \* indicates p <0.05, \*\* p <0.01, Wilcoxon-signed rank test. CS = serum after the reference shake; HFS = serum after the high fat shake.

Figure S4

**A** 24h LPS inhibition experiment

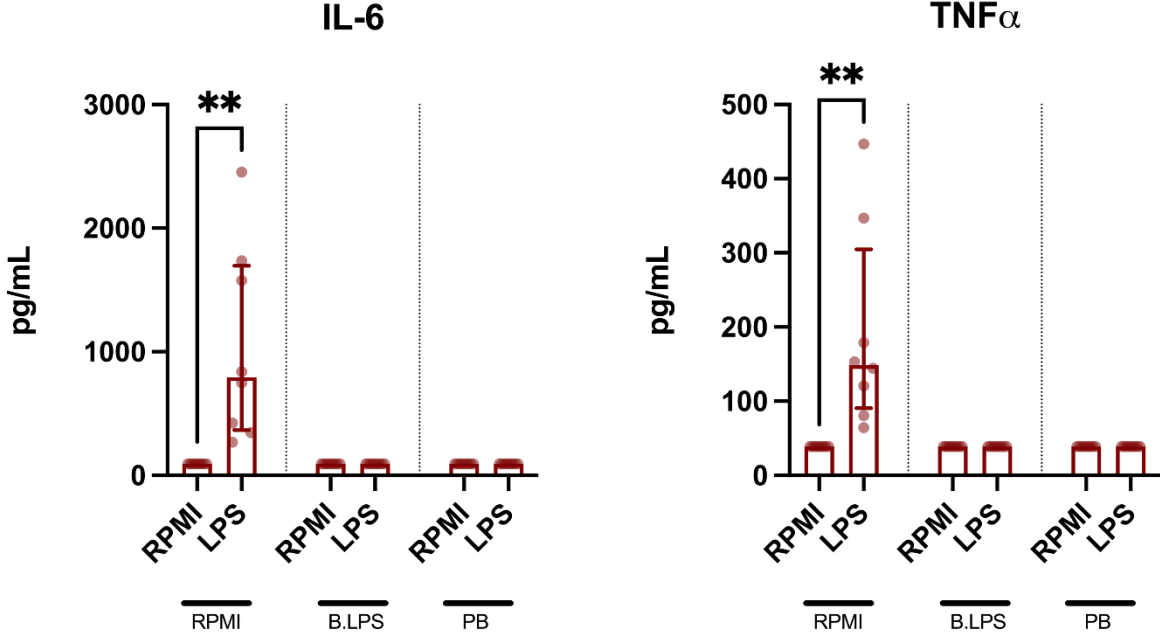

**B**

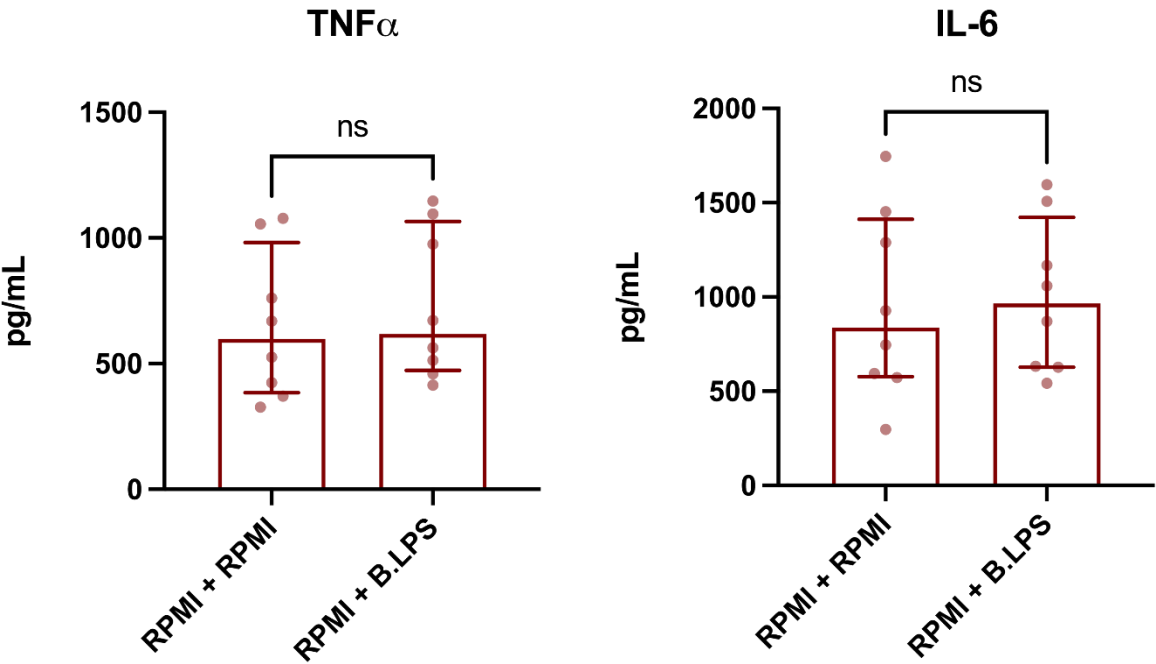

**Figure S4, related to Figure 3. A.** Adherent human monocytes were pre-incubated for 1 hour with plain RPMI or Bartonella LPS (B. LPS). After pre-incubation, the cells were exposed for 24 hours to E. Coli LPS, with (PB) or without neutralization of LPS. After 24 hours, cytokine production was measured (n=8). Data are presented as median  $\pm$ IQR. **B.** Adherent human monocytes were pre-incubated for 1 hour with plain RPMI or Bartonella LPS (B. LPS). After pre-incubation, the cells were exposed for 24 hours to a plain RPMI. On day 6, cells were restimulated for 24 hours with LPS and cytokine production was measured (n=8). Median  $\pm$ IQR. \*\* p <0.01, Wilcoxon-signed rank test.

Figure S5

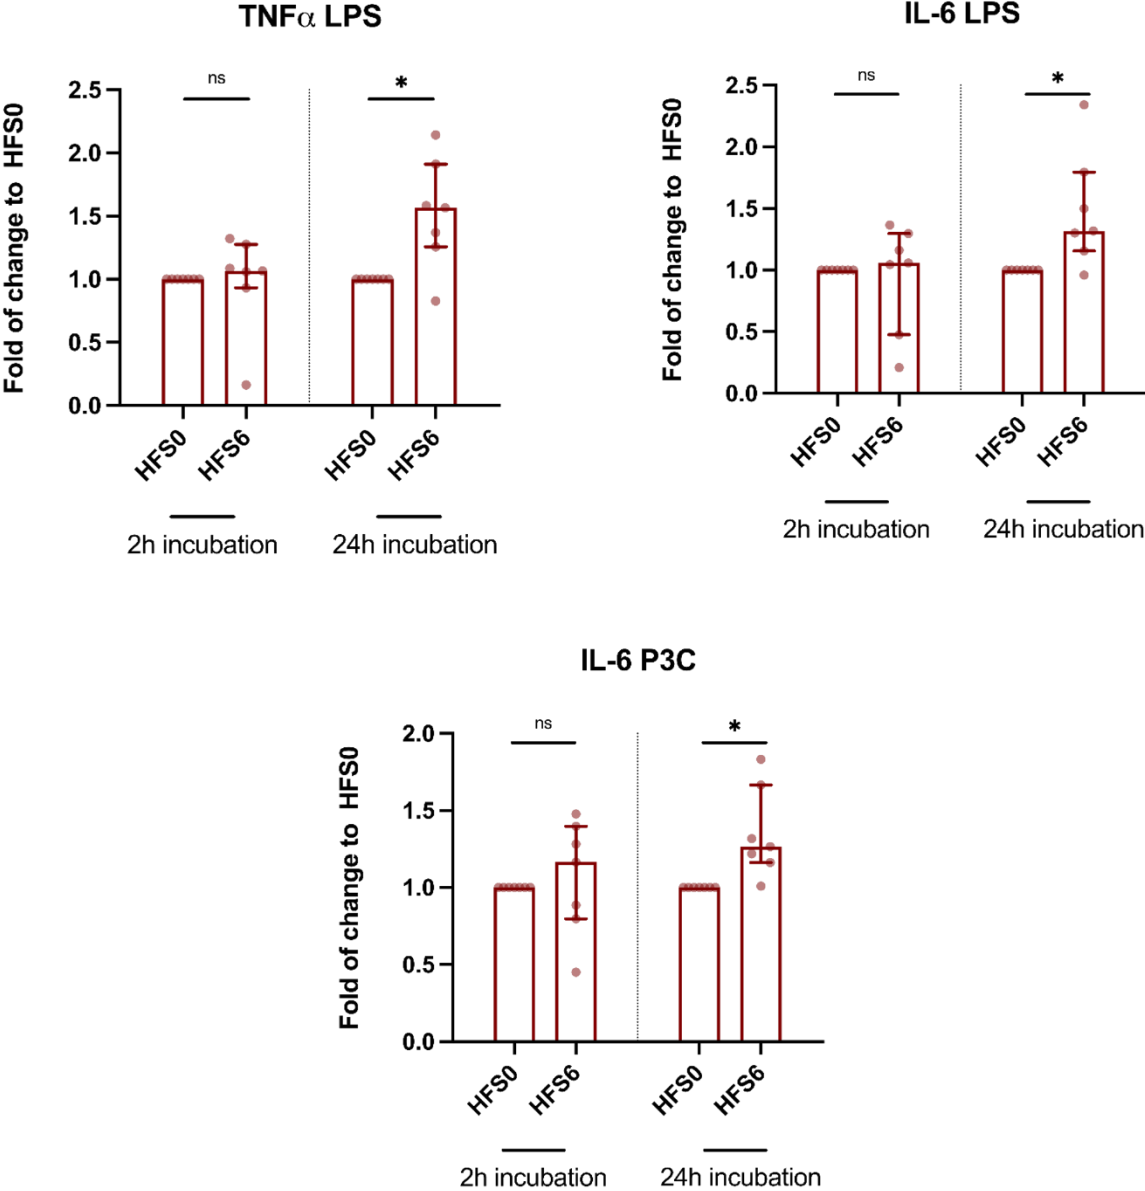

**Figure S5.** Adherent monocytes were incubated with the serum obtained at t=0h and t=6h after the high-fat shake for either 2 hours or 24 hours. On day 6, the cells were restimulated with LPS or P3C for 24 hours, after which cytokine production was measured (TNF $\alpha$  and IL-6). As most replicates were below detection limit for TNF $\alpha$  upon P3C restimulation, these results are excluded from the analysis. Data are presented as fold change of HFS6 over HFS0 (n=7). Median  $\pm$  IQR. \* indicates p < 0.05, Wilcoxon-signed rank test.



Figure S6

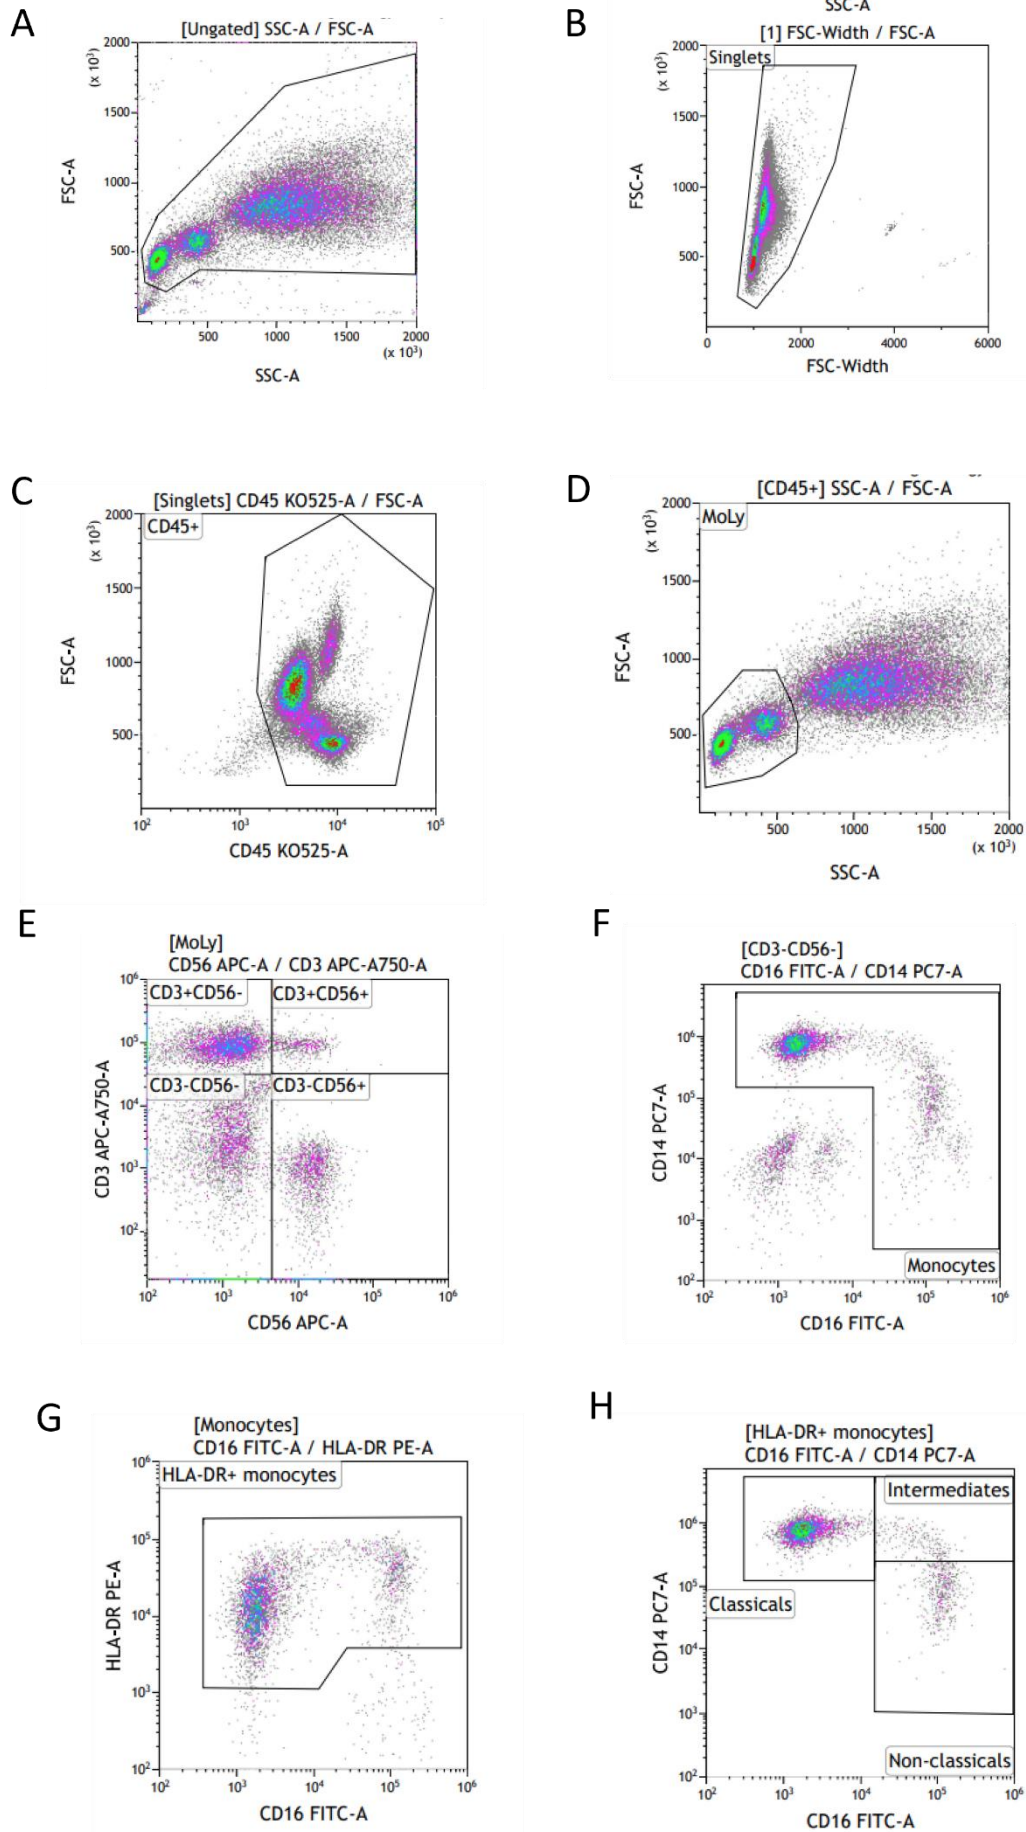

**Figure S6, related to Table 2.** Gating strategy for flow cytometry analysis. **A.** Debris was removed. **B.** Singlet were selected. **C.** Gating for CD45+ cells. **D.** Gating for monocytes and lymphocytes (MoLy) based on forward- and side scatter. **E.** The CD3-CD56 plot was used for the exclusion of T-lymphocytes and natural-killer cells. The CD3-CD56- quadrant was selected for further gating. **F.** B-cells were excluded based on low CD14 and low CD16 expression. **G.** HLA-DR- cells were excluded. **H.** In a CD14-CD16 plot the total monocyte population was divided into subsets: classical monocytes (CD14<sup>++</sup>CD16<sup>-</sup>), intermediate monocytes (CD14<sup>++</sup>CD16<sup>+</sup>) and non-classical monocytes (CD14<sup>+</sup>CD16<sup>++</sup>).

## Supplementary tables

**Table S1.** Example of a standardized meal plan (2000 kcal)

### Breakfast

---

- 2 slices of whole wheat bread with 1 unit (=10 grams) low-fat margarine, i.e. 1 with slim cheese and 1 with jam
- 250 mL of semi-skimmed milk

### Snack

---

- 1 portion of fruit

### Lunch

---

- 2 slices of whole wheat bread with 1 unit (=10 grams) low-fat margarine, i.e. 1 with ½ avocado and 1 with jam
- 150 mL of semi-skimmed milk

### Snack

---

- 1 portion of fruit
- 25 grams of unsalted nuts

### Dinner

---

- 4 serving spoons: potatoes
- 100 grams chicken
- 5 serving spoons: vegetables (250 g)
- 1 table spoon of olive oil for the preparation of the food

**N.B.** Please, do not drink any sodas, fruit juices or alcoholic beverages the day before or during study days. During study days it is allowed to drink tea and/or coffee (without the addition of sugar or milk) or water.

**Total**

---

Energy 1975 kcal:

- Fat 68.8 g (31 E%)

*Of which saturated* 17.6 g (8E%)

- Protein 94.3 g

- Carbohydrates 228.2 g (46 E%)

*Of which sugars* 88.3 g

- Fiber 31.6 g

- Salt 2.9 g

## Substitute options

| Product                  | Substitute                                                                                                                                                                                                                                        |
|--------------------------|---------------------------------------------------------------------------------------------------------------------------------------------------------------------------------------------------------------------------------------------------|
| 1 slice of bread         | <ul style="list-style-type: none"> <li>- 2 slices of knäckebröd</li> <li>- 2 pieces of rusk</li> <li>- 1 slice of rye bread</li> <li>- 1 portion of oats (40 grams)</li> <li>- 1 granola ball</li> <li>- 1 slice of raisin bread</li> </ul>       |
| Savory sandwich toppings | <ul style="list-style-type: none"> <li>- slim cheese</li> <li>- hüttenkäse</li> <li>- lean meat: chicken breast, turkey breast, roast beef</li> </ul>                                                                                             |
| Sweet sandwich toppings  | <ul style="list-style-type: none"> <li>- jam</li> <li>- apple syrup</li> </ul>                                                                                                                                                                    |
| 1 portion of dairy       | <ul style="list-style-type: none"> <li>- 150 mL milk: (semi-)skimmed or buttermilk</li> <li>- 150 mL soy milk</li> <li>- 200 grams yoghurt: (semi-)skimmed</li> <li>- 200 grams quark: (semi-)skimmed</li> </ul>                                  |
| 1 portion of fruit       | <ul style="list-style-type: none"> <li>- 1 banana</li> <li>- 1 apple</li> <li>- 1 pear</li> <li>- 1 orange</li> <li>- 1 portion of grapes (125 grams)</li> <li>- 2 peaches/apricots/prunes</li> <li>- 2 clementines</li> <li>- 2 kiwis</li> </ul> |
| Drinks                   | <ul style="list-style-type: none"> <li>- water</li> <li>- tea, coffee (without sugar)</li> <li>- sugar free lemonade</li> </ul>                                                                                                                   |
| Meat/meat substitutes    | <ul style="list-style-type: none"> <li>- 100-125 grams chicken breast, turkey breast</li> <li>- 100-125 grams lean beef</li> <li>- 1-2 eggs</li> <li>- 1 piece of vegetarian burger/balls, tofu, tempeh, etc.</li> </ul>                          |

**Table S2**

| <b>Nutritional value</b>             | <b>High-fat shake</b> | <b>Reference shake</b> |
|--------------------------------------|-----------------------|------------------------|
| <b>Energy (kcal)</b>                 | 900                   | 400                    |
| <b>Protein (g)</b>                   | 9                     | 17                     |
| <b>Carbohydrates (g)</b>             | 22                    | 49.5                   |
| <b>Fat (g)</b>                       | 95                    | 14.5                   |
| <b><i>of which saturated (g)</i></b> | 54                    | 9                      |
| <b>Fiber (g)</b>                     | 0                     | 2.3                    |

**Table S2.** Overview of the nutrient composition of the high-fat and reference shake. Adapted from Esser et al.<sup>1</sup>

## References

1. Esser D, Oosterink E, op 't Roodt J, Henry RM, Stehouwer CD, Muller M, Afman LA. Vascular and inflammatory high fat meal responses in young healthy men; a discriminative role of IL-8 observed in a randomized trial. *PLoS One* 2013;**8**:e53474.
